# Supplementary material for: Bifidobacterium breve Attenuates Murine Dextran Sodium Sulfate-Induced Colitis and Increases Regulatory T Cell Responses
Source: PubMed Central journal article supplement (PMC4008378; doi:10.1371/journal.pone.0095441), 2014-05-02

Figure S1

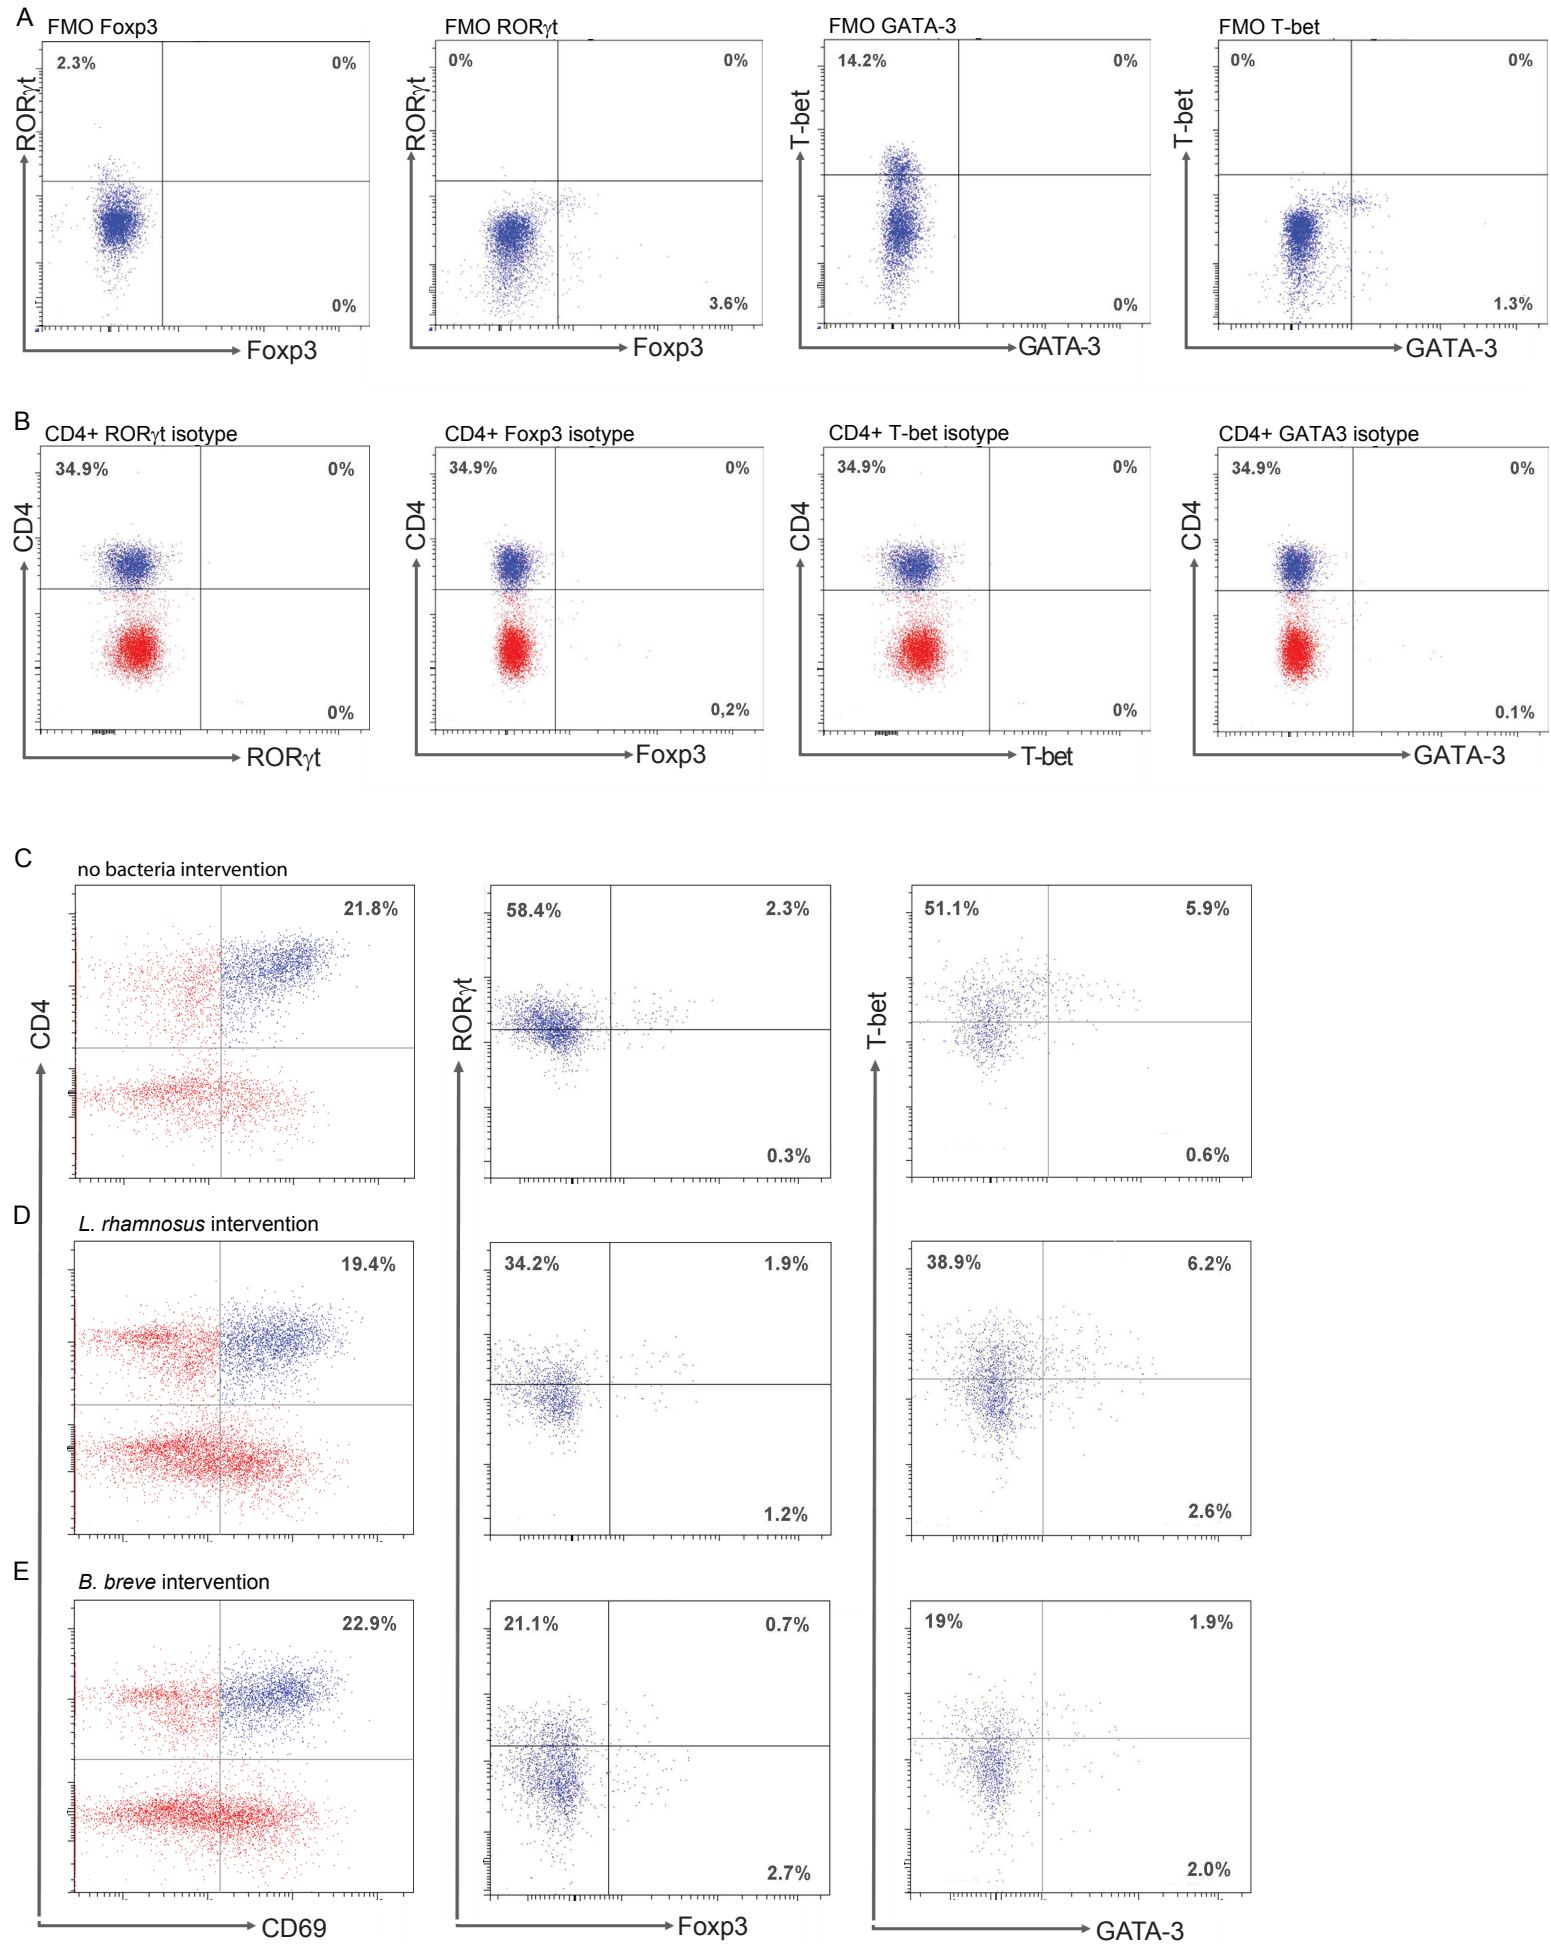

Supplement: pone.0095441.s001.pdf [file pone.0095441.s001.pdf]
